# Supplementary material
Source: Springer Nature journal article supplement (https://www.springermedizin.de/resource/supplementary/13012_2010_456_MOESM5_ESM.pdf/9629724)
Supplement: MOESM5 [file 9629724]

## Enabling factors

- CHMT support
- Existence of committees & boards
- Perceived needs of stakeholders

## Mechanism of change

Appeals/revision

## Constraining factors

- Low level of public awareness
- Lack of appeals culture
- Inflexible budget ceilings
- Untimely disbursement of funds
- Lack of confidence/fear
